# Supplementary material for: Identification of the Role and Clinical Prognostic Value of Target Genes of m6A RNA Methylation Regulators in Glioma
Source: Front Cell Dev Biol. 2021 Sep 13;9:709022. doi: 10.3389/fcell.2021.709022 (PMC8473691; doi:10.3389/fcell.2021.709022)
Supplement: Supplementary Table S11 — The summary of role of seven-gene signature in other cancers. [file Table_11.XLS]

## Sheet: Sheet1
Gene	Tumor type	Change	Function	Airticle
Writers
METTL3	Glioblastoma	UP	Enhances SOX2 mRNA stability and expression, promotes glioblastoma growth, and prolongs mouse survival	Essential role of METTL3-mediated m(6)A modification in glioma stem-like cells maintenance and radioresistance
	Renal Cell Carcinoma	UP	Unknown	The role of m6A, m5C and Ψ RNA modifications in cancer: Novel therapeutic opportunities
	Prostate Cancer	UP	Increases the mRNA stability of cell adhesion genes	METTL3 enhances cell adhesion through stabilizing integrin β1 mRNA via an m6A-HuR-dependent mechanism in prostatic carcinoma
	Ovarian Cancer	UP	Stimulates the translation of oncogenes	METTL3 serves an oncogenic role in human ovarian cancer cells partially via the AKT signaling pathway
	Bladder Cancer	UP	Promotes miR221/222 maturation	The role of m6A, m5C and Ψ RNA modifications in cancer: Novel therapeutic opportunities
	Breast Cancer	UP	Inhibits miRNA let-7 and decreases proliferation and survival.	HBXIP-elevated methyltransferase METTL3 promotes the progression of breast cancer via inhibiting tumor suppressor let-7g
	Colon Cancer	UP	Enhances miRNA-1246 expression and metastasis	Upregulated METTL3 promotes metastasis of colorectal Cancer via miR-1246/SPRED2/MAPK signaling pathway
	Gastric Cancer	UP	Enhances the stability of oncogenic mRNAs	The role of m6A, m5C and Ψ RNA modifications in cancer: Novel therapeutic opportunities
	AML	UP	Promotes translation of oncogenes’ mRNAs, inhibiting cell differentiation and apoptosis.	The role of m6A, m5C and Ψ RNA modifications in cancer: Novel therapeutic opportunities
	Hepatocellular carcinoma	UP	Inhibits mRNA expression of tumour suppressors, increasing proliferation and metastasis	The role of m6A, m5C and Ψ RNA modifications in cancer: Novel therapeutic opportunities
	Lung Cancer	UP	Inhances miR-143-3p expression and promotes oncogenes translation	The role of m6A, m5C and Ψ RNA modifications in cancer: Novel therapeutic opportunities
	Osteosarcoma	UP	Promotes osteosarcoma progression by regulating the m6A level of LEF1	The m6A methyltransferase METTL3 promotes osteosarcoma progression by regulating the m6A level of LEF1
	Melanoma	UP	Unknown	The role of m6A, m5C and Ψ RNA modifications in cancer: Novel therapeutic opportunities
	Endometrial Cancer	Down	Modulates the expression of members of AKT pathway and inhibits cell proliferation	The role of m6A, m5C and Ψ RNA modifications in cancer: Novel therapeutic opportunities
	Glioblastoma	Down	Reduces oncogene expression and inhibits the self-renewal	The role of m6A, m5C and Ψ RNA modifications in cancer: Novel therapeutic opportunities
KIAA1429	Breast cancer	UP	Promotes proliferation, metastasis, tumorigenesis	Role of m6A methyltransferase component VIRMA in multiple human cancers (Review)
	Liver cancer	UP	Promotes cell proliferation, tumor growth and metastasis, cell apoptosis resistance	Role of m6A methyltransferase component VIRMA in multiple human cancers (Review)
	Gastric cancer	UP	Promotes proliferation	Role of m6A methyltransferase component VIRMA in multiple human cancers (Review)
	Kidney cancer	UP	Unknown	Role of m6A methyltransferase component VIRMA in multiple human cancers (Review)
	Prostate cancer	UP	Promotes proliferation, metastasis, tumorigenesis	Role of m6A methyltransferase component VIRMA in multiple human cancers (Review)
	Osteosarcoma	UP	Promotes proliferation, invasion, and migration	Role of m6A methyltransferase component VIRMA in multiple human cancers (Review)
	Lung squamous cell carcinoma and Lung adenocarcinoma	UP	Unknown	Role of m6A methyltransferase component VIRMA in multiple human cancers (Review)
	Colon adenocarcinoma	UP	Unknown	Role of m6A methyltransferase component VIRMA in multiple human cancers (Review)
	Rectum adenocarcinoma	UP	Unknown	Role of m6A methyltransferase component VIRMA in multiple human cancers (Review)
	Testicular cancer	UP	Unknown	Role of m6A methyltransferase component VIRMA in multiple human cancers (Review)
	Head and neck squamous cell carcinoma	UP	Unknown	Role of m6A methyltransferase component VIRMA in multiple human cancers (Review)
	Cholangiocarcinoma	UP	Unknown	Role of m6A methyltransferase component VIRMA in multiple human cancers (Review)
	Uterine corpus endometrial carcinoma	Down	Unknown	Role of m6A methyltransferase component VIRMA in multiple human cancers (Review)
	Kidney renal papillary cell carcinoma	Down	Unknown	Role of m6A methyltransferase component VIRMA in multiple human cancers (Review)
	Thyroid carcinoma	Down	Unknown	Role of m6A methyltransferase component VIRMA in multiple human cancers (Review)
	Papillary thyroid carcinoma	Down	Unknown	Role of m6A methyltransferase component VIRMA in multiple human cancers (Review)
	Ovarian cancer	Down	Unknown	Role of m6A methyltransferase component VIRMA in multiple human cancers (Review)
METTL16	Colorectal cancer	UP	Unknown	Expression patterns and prognostic value of m(6)A-related genes in colorectal cancer
	Hepatocellular carcinoma	Down	Low METT16 expression is association with activation of multiple metabolic pathways in HCC.	Gene Signatures and Prognostic Values of m6A Regulators in Hepatocellular Carcinoma
Readers
IGF2BP2	AML	UP	Increases cell growth	The role of IGF2BP2, an m6A reader gene, in human metabolic diseases and cancers
	Breast cancer	UP	Promotes proliferation, invasion, tumor growth, autoantibody response	The role of IGF2BP2, an m6A reader gene, in human metabolic diseases and cancers
	Colorectal cance	UP	Promotes proliferation, survival via regulating miR-195/RAF1	The role of IGF2BP2, an m6A reader gene, in human metabolic diseases and cancers
	Glioma	UP	Promotes proliferation, invasion	The role of IGF2BP2, an m6A reader gene, in human metabolic diseases and cancers
	Hepatocellular carcinoma	UP	Promotes proliferation, invasion, and migration	The role of IGF2BP2, an m6A reader gene, in human metabolic diseases and cancers
	Head and Neck Squamous Cell Carcinoma	UP	Scavenging and degradation, synthesis and metabolism, cell growth, death and motility	The role of IGF2BP2, an m6A reader gene, in human metabolic diseases and cancers
	Pancreatic ductal adenocarcinoma	UP	Stabilizing GLUT1 mRNA.	Insulin-like growth factor 2 mRNA binding protein 2 promotes aerobic glycolysis and cell proliferation in pancreatic ductal adenocarcinoma via stabilizing GLUT1 mRNA
	Gallbladder carcinoma	UP	Shows the shorter survival time	IMP2/IGF2BP2 expression, but not IMP1 and IMP3, predicts poor outcome in patients and high tumor growth rate in xenograft models of gallbladder cancer
YTHDF1	Ovarian cancer	UP	Facilitates tumourigenesis and metastasis	YTHDF1 Regulates Tumorigenicity and Cancer Stem Cell-Like Activity in Human Colorectal Carcinoma
	Colorectal cancer	UP	Facilitates tumourigenesis and metastasis	The m6A reader YTHDF1 promotes ovarian cancer progression via augmenting EIF3C translation
	Breast cancer	UP	Unknown	N6-methyladenosine-related Genomic Targets are Altered in Breast Cancer Tissue and Associated with Poor Survival
Six validated targets
COL18A1	Osteosarcoma	NA	The homozygous DN and NN genotypes of COL18A1 D104N were associated with the risk of osteosarcoma	Genetic polymorphisms in COL18A1 influence the development of osteosarcoma
NASP	Ovarian cancer	UP	Unknown	Analysis of the expression of human tumor antigens in ovarian cancer tissues
	Head and Neck Squamous Cell Carcinoma cell lines	NA	Increases the viability, migration and invasion	MiR-381-3p suppresses biological characteristics of cancer in head-neck squamous cell carcinoma cells by targeting nuclear autoantigenic sperm protein (NASP)
TIMP1	Breast Cancer	UP	has the correlation with cancer progression or poor prognosis	TIMPs: versatile extracellular regulators in cancer
	Gliomas	UP	has the correlation with cancer progression or poor prognosis	TIMPs: versatile extracellular regulators in cancer
	Head and Neck Squamous Cell Carcinoma cell lines	UP	has the correlation with cancer progression or poor prognosis	TIMPs: versatile extracellular regulators in cancer
	Lung Cancer	UP	has the correlation with cancer progression or poor prognosis	TIMPs: versatile extracellular regulators in cancer
	Gastric adenocarcinomas	UP	has the correlation with cancer progression or poor prognosis	TIMPs: versatile extracellular regulators in cancer
	Colon Cancer	UP	has the correlation with cancer progression or poor prognosis	TIMPs: versatile extracellular regulators in cancer
	Melanoma	UP	has the correlation with cancer progression or poor prognosis	TIMPs: versatile extracellular regulators in cancer
	Pancreatic ductal adenocarcinoma	UP	has the correlation with cancer progression or poor prognosis	TIMPs: versatile extracellular regulators in cancer
U2AF2	Non-small cell lung cancer	UP	High expression of U2AF2 is significantly associated with worse prognosis in NSCLC patients	OTUB2 stabilizes U2AF2 to promote the Warburg effect and tumorigenesis via the AKT/mTOR signaling pathway in non-small cell lung cancer
VEGFA	Bladder cancer	UP	Accelerates cell propagation, migration and invasiveness	Circ0001429 regulates progression of bladder cancer through binding miR-205-5p and promoting VEGFA expression
PHLPP2	Colorectal cancer	Down	PHLPP2 expression was correlated with differentiation, invasion, and lymph node metastasis	Expression of PHLPP2 correlates with clinicopathologic characteristics and prognosis in colorectal cancer
	Colon cancer	Down	PHLPP2 up-regulation suppresses the colon cancer cell proliferation, migration, invasion, and epithelial-mesenchymal transition, and promotes cell apoptosis	PHLPP2 is regulated by competing endogenous RNA network in pathogenesis of colon cancer
